# Supplementary material for: An acid and alkali-resistant triboelectric nanogenerator
Source: Royal Society of Chemistry journal article supplement (doi:10.1039/d0nr06341j), 2020-01-01
Supplement: d0nr06341j1.pdf [file d0nr06341j1.pdf]

## Supporting Information

### Acid and alkali-resistant triboelectric nanogenerator

Jun-Peng Wu,<sup>a)†</sup> Wen Liang,<sup>a)†</sup> Wei-Zhi Song,<sup>a)†</sup> Li-Na Zhou,<sup>a)</sup> Xiao-Xiong Wang,<sup>a)</sup>  
Seeram Ramakrishna,<sup>b)</sup> Yun-Ze Long<sup>a)c)\*</sup>

<sup>a)</sup> *Collaborative Innovation Center for Nanomaterials & Devices, College of Physics,  
Qingdao University, Qingdao 266071, China*

<sup>b)</sup> *Center for Nanofibers & Nanotechnology, Faculty of Engineering, National  
University of Singapore, Singapore*

<sup>c)</sup> *Collaborative Innovation Center for Eco-Textiles of Shandong Province, and State  
Key Laboratory of Bio-Fibers and Eco-Textiles, Qingdao University, Qingdao  
266071, China*

---

<sup>†</sup>These three authors contributed equally to this work.

\*Corresponding author. Tel: +86 139 5329 0681.

E-mail: [yunze.long@163.com](mailto:yunze.long@163.com) or [yunze.long@qdu.edu.cn](mailto:yunze.long@qdu.edu.cn)

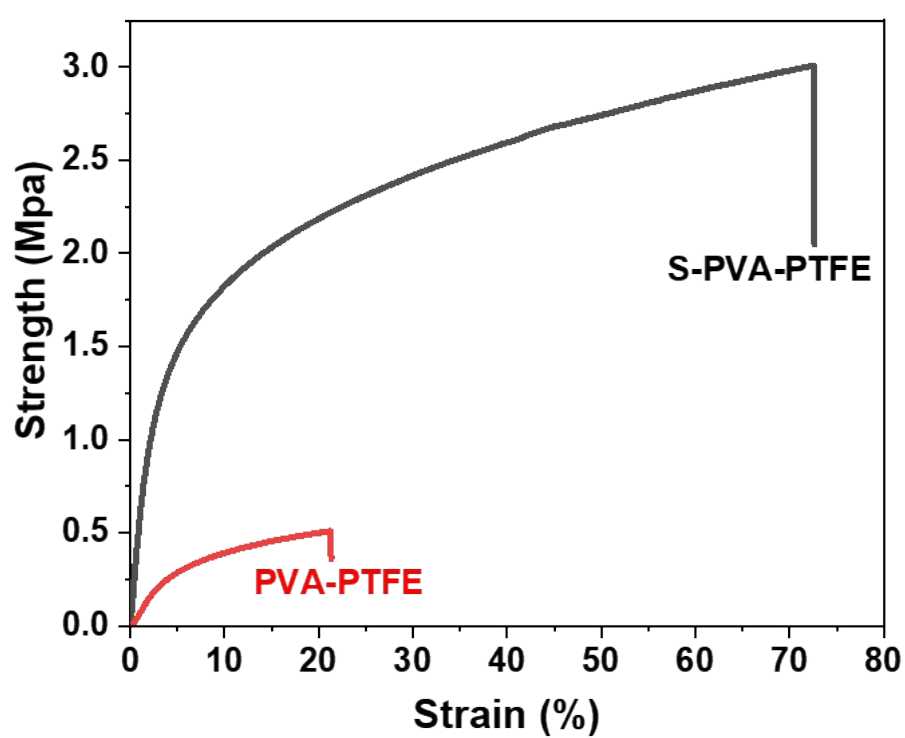

**Figure S1.** The tensile properties of PVA-PTFE composite membrane and sintered PVA-PTFE composite membrane.

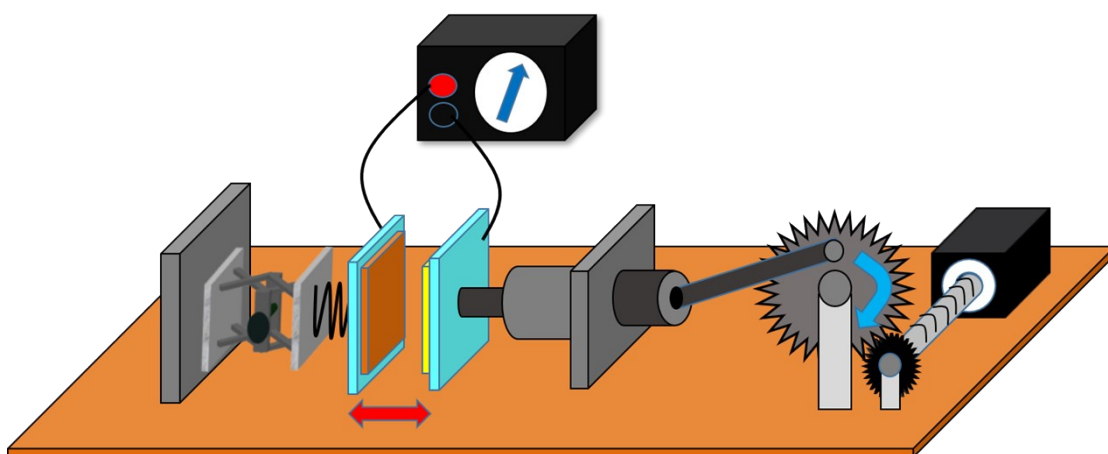

**Figure S2.** Schematic diagram of the home-made TENG test device.

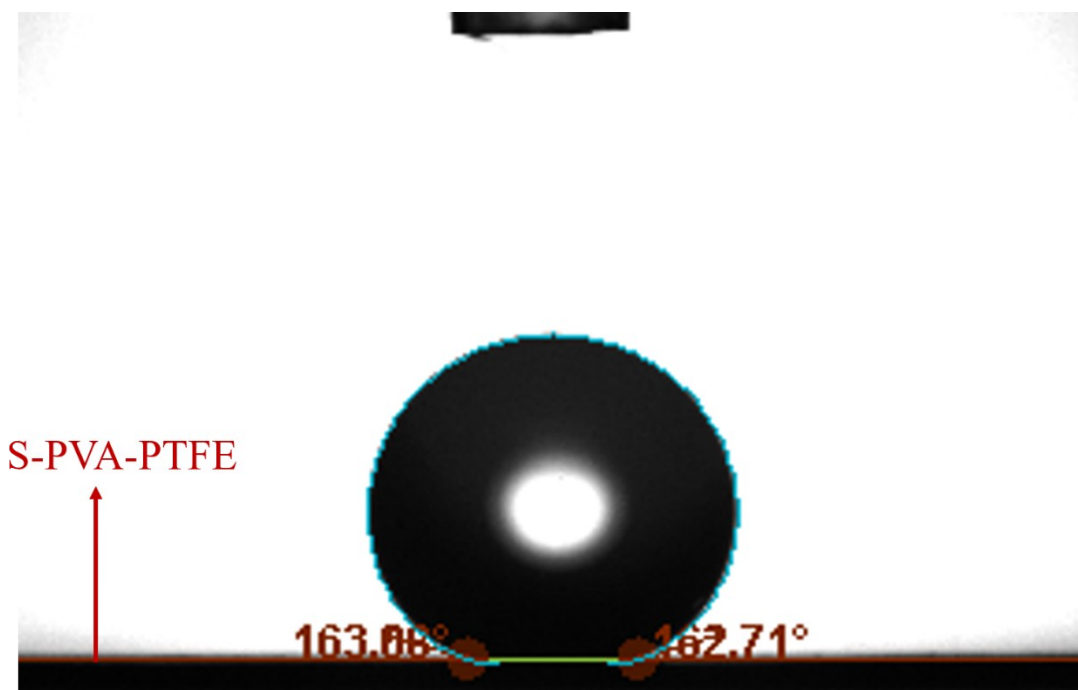

**Figure S3.** Water static contact angle of the S-PVA-PTFE membrane.
